# Supplementary material
Source: publisher site journal article supplement (https://www.e-cmh.org/upload/media/cmh-2022-0316-Supplementary-Fig-1.pdf)
Supplement: Supplementary file 1 [file cmh-2022-0316-Supplementary-Fig-1.pdf]

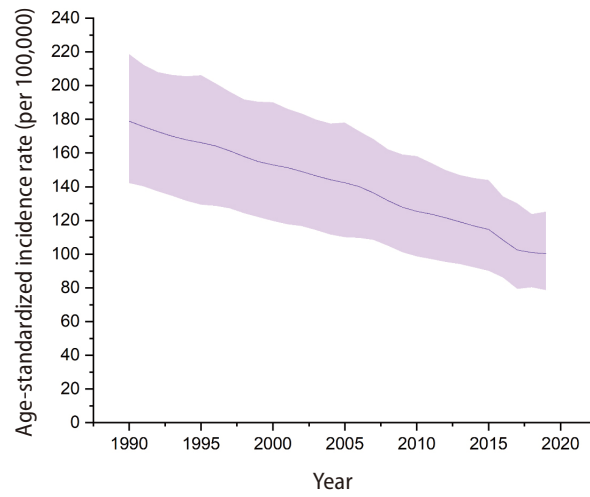

**Supplementary Figure 1.** Age-standardized incidence rate of acute HBV in high-income North America from 1990 to 2019. HBV, hepatitis B virus.
